# Supplementary material
Source: PubMed Central journal article supplement (PMC7112149)

# **Development of a sensitive and quantitative method for the identification of two major furan fatty acids in human plasma**

Long Xu<sup>1</sup>, Changfeng Hu<sup>2</sup>, Yongguo Liu<sup>3</sup>, Siming Li<sup>4</sup>, Walter Vetter<sup>5</sup>, Huiyong Yin<sup>6\*</sup> and Yonghua Wang<sup>1\*</sup>

<sup>1</sup>School of Food Science and Engineering, South China University of Technology, Guangzhou 510640, China

<sup>2</sup>College of Basic Medical Sciences, Zhejiang Chinese Medical University, Hangzhou, Zhejiang 310053, China

<sup>3</sup>Beijing Advanced Innovation Centre for Food Nutrition and Human Health, Beijing Key Laboratory of Flavor Chemistry, Beijing Technology and Business University, Beijing 100048, China

<sup>4</sup>Analytical Applications Center, Analytical Instruments Division, Shimadzu (China) Co., LTD. Guangzhou Branch, Guangzhou 510656, China

<sup>5</sup>Institute of Food Chemistry, Department of Food Chemistry (170b), University of Hohenheim, D-70593 Stuttgart, Germany

<sup>6</sup>CAS Key Laboratory of Nutrition, Metabolism and Food Safety, Shanghai Institute of Nutrition and Health, Shanghai Institutes for Biological Sciences (SIBS), Chinese Academy of Sciences (CAS), Shanghai 200031, China

**Supplemental Table S1.** Concentrations for furan fatty acid standards in working solutions

| <b>Furan fatty acids</b> | <b>Concentration (ng/mL)</b> |           |           |           |           |           |           |           |           |
|--------------------------|------------------------------|-----------|-----------|-----------|-----------|-----------|-----------|-----------|-----------|
|                          | <b>S1</b>                    | <b>S2</b> | <b>S3</b> | <b>S4</b> | <b>S5</b> | <b>S6</b> | <b>S7</b> | <b>S8</b> | <b>S9</b> |
| 11D3                     | 0.5                          | 1         | 5         | 10        | 20        | 40        | 80        | 160       | 320       |
| 11D5                     | 2.5                          | 5         | 25        | 50        | 100       | 200       | 400       | 800       | 1600      |

**Supplemental Table S2.** Key parameters for monitoring 11D3 and 11D5

| <b>Furan<br/>fatty acids</b> | <b>Precursor<br/>ion (<i>m/z</i>)</b> | <b>Product<br/>ion<br/>(<i>m/z</i>)</b> | <b>Dwell time<br/>(msec)</b> | <b>Q1 voltage<br/>(V)</b> | <b>CE<br/>(V)</b> | <b>Q3 voltage<br/>(V)</b> |
|------------------------------|---------------------------------------|-----------------------------------------|------------------------------|---------------------------|-------------------|---------------------------|
| 11D3                         | 321                                   | 71                                      | 19                           | 23                        | 28                | 25                        |
|                              | 321                                   | 99                                      | 19                           | 14                        | 26                | 12                        |
|                              | 321                                   | 141                                     | 19                           | 15                        | 33                | 21                        |
| 11D5                         | 349                                   | 71                                      | 19                           | 12                        | 34                | 16                        |
|                              | 349                                   | 127                                     | 19                           | 24                        | 26                | 23                        |
|                              | 349                                   | 141                                     | 19                           | 10                        | 38                | 24                        |

**Supplemental Table S3.** Key parameters for monitoring 11D3-AMMP and 11D5-AMMP

| <b>Furan<br/>fatty acid<br/>derivatives</b> | <b>Precursor<br/>ion (<i>m/z</i>)</b> | <b>Product<br/>ion<br/>(<i>m/z</i>)</b> | <b>Dwell time<br/>(msec)</b> | <b>Q1 voltage<br/>(V)</b> | <b>CE<br/>(V)</b> | <b>Q3 voltage<br/>(V)</b> |
|---------------------------------------------|---------------------------------------|-----------------------------------------|------------------------------|---------------------------|-------------------|---------------------------|
| 11D3-<br>AMMP                               | 428                                   | 107                                     | 13                           | -12                       | -52               | -18                       |
|                                             | 428                                   | 124                                     | 13                           | -12                       | -40               | -20                       |
|                                             | 428                                   | 178                                     | 13                           | -13                       | -43               | -18                       |
| 11D5-<br>AMMP                               | 456                                   | 107                                     | 13                           | -16                       | -52               | -18                       |
|                                             | 456                                   | 124                                     | 13                           | -10                       | -45               | -22                       |
|                                             | 456                                   | 178                                     | 13                           | -16                       | -48               | -18                       |

**Supplemental Figure S1.** The derivatization reactions of 11D3 and 11D5 with BMP & CMP

( $m=2$  or 4)

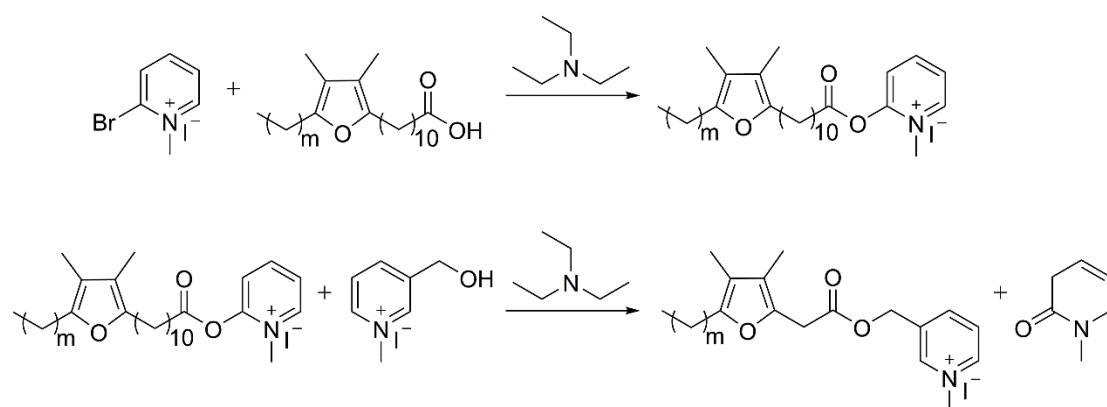

Supplemental Figure S2. MS/MS spectra of (a) 11D3 and (b) 11D5 in the negative mode

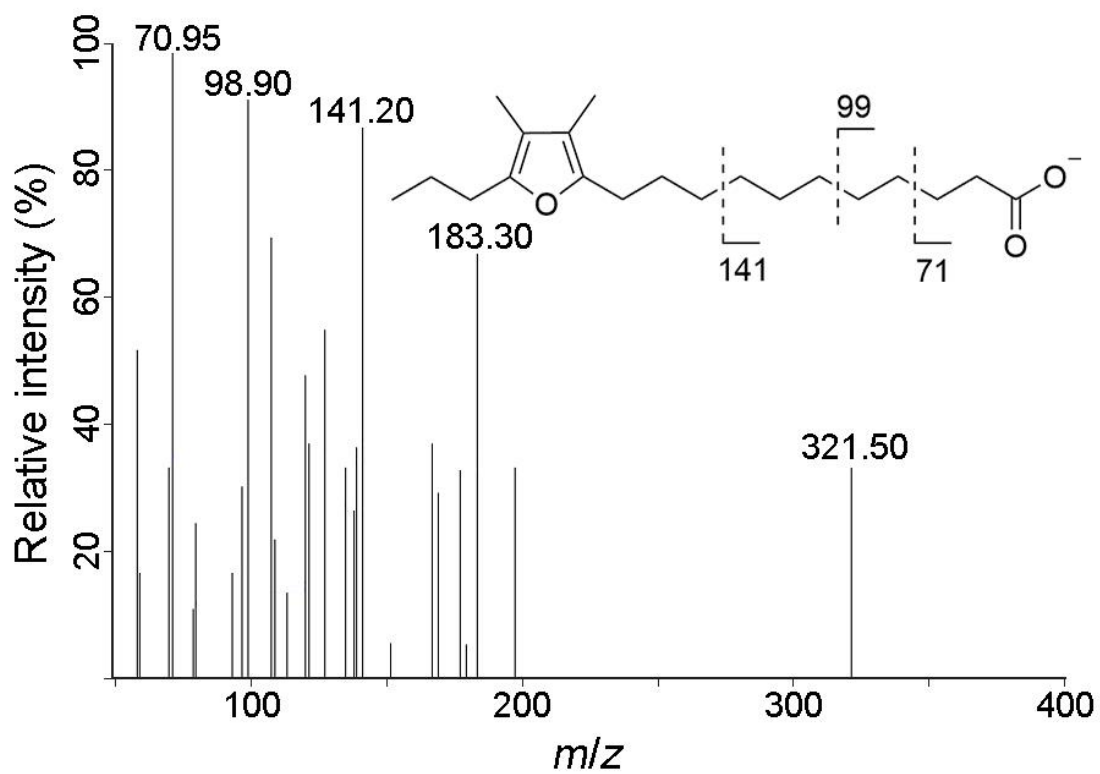

(a)

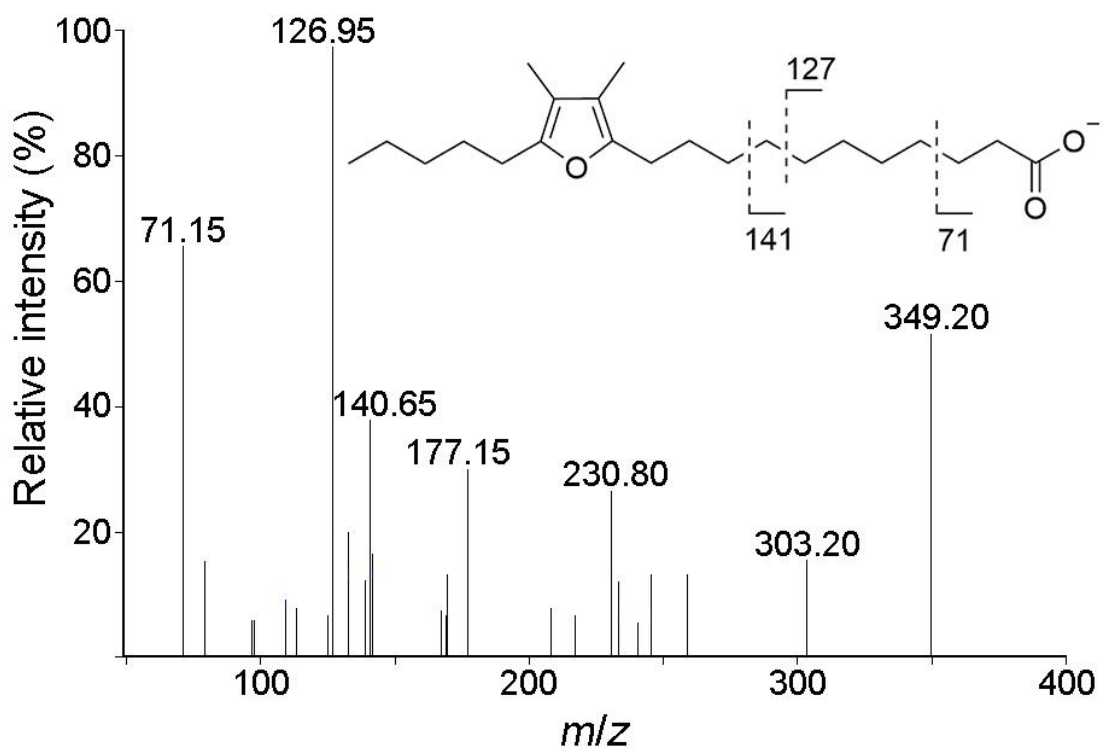

(b)

**Supplemental Figure S3.** MS/MS spectra of oxidized furan fatty acids-AMPP. (a)  $[11D3\text{-AMPP} + 32]^+$ ; (b)  $[11D5\text{-AMPP} + 32]^+$ .

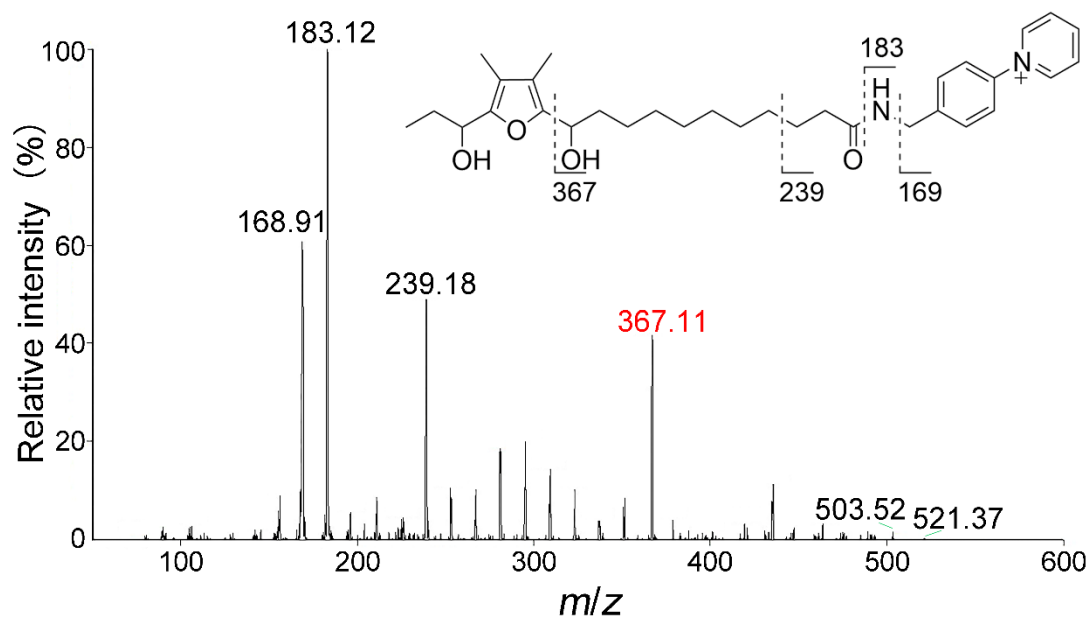

(a)

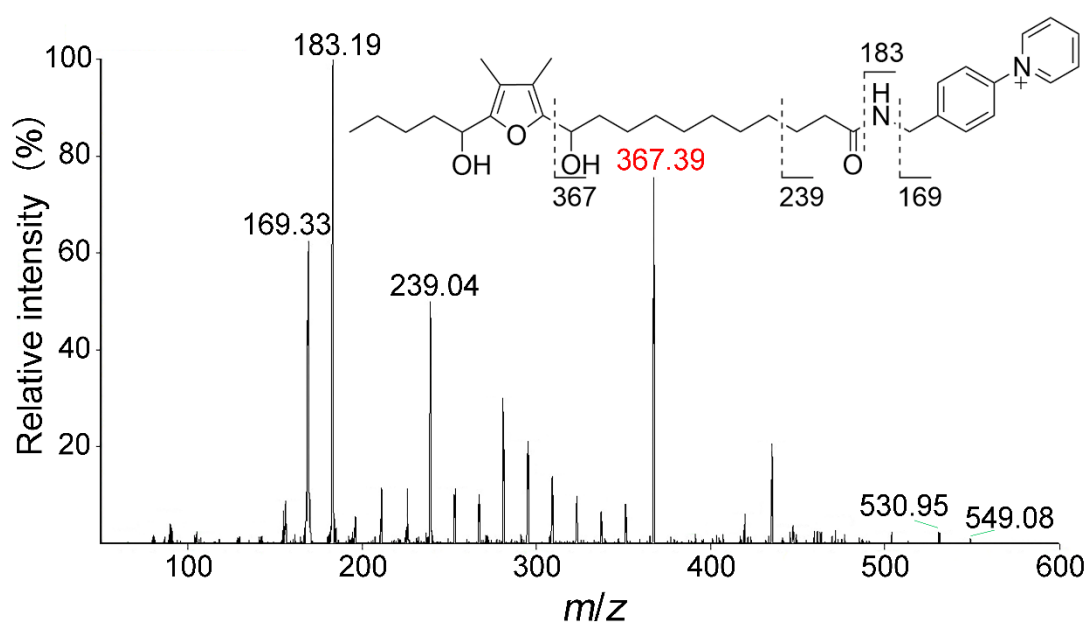

(b)

**Supplemental Figure S4** Precursor ions at retention time of 4.05 min. (a) precursor of  $m/z$  107, (b) precursor of  $m/z$  124, (c) precursor of  $m/z$  178.

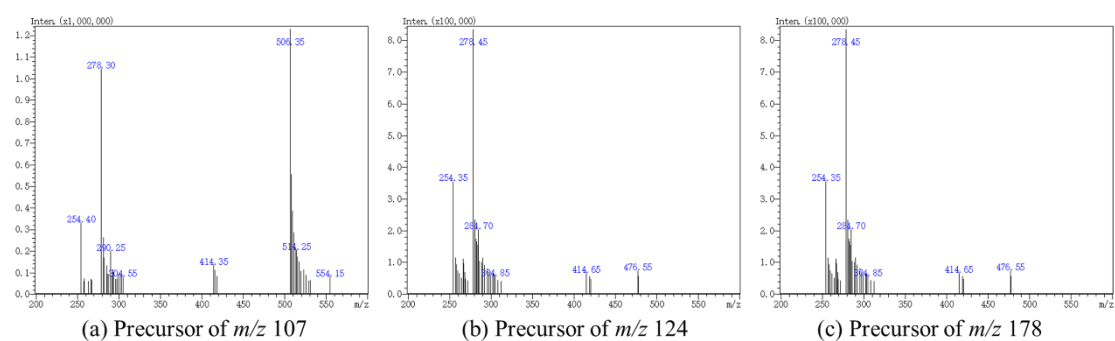

**Supplemental Figure S5** Precursor ions at retention time of 4.56 min. (a) precursor of  $m/z$  107, (b) precursor of  $m/z$  124, (c) precursor of  $m/z$  178.

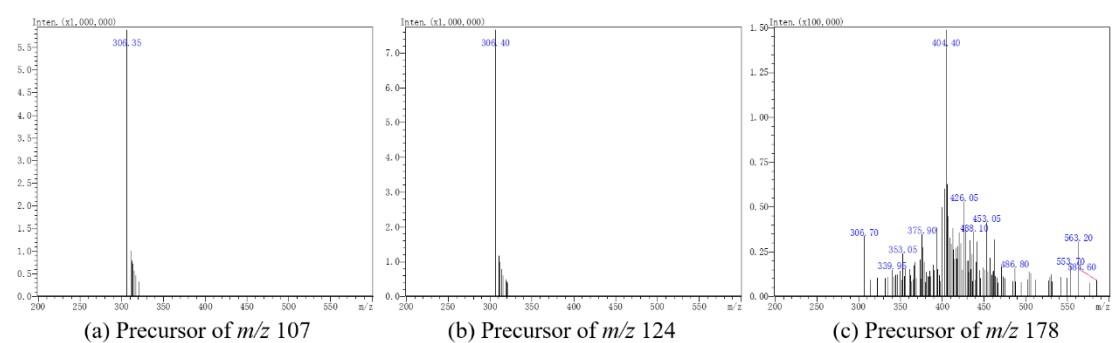

**Supplemental Figure S6** Precursor ions at retention time of 5.04 min. (a) precursor of  $m/z$  107, (b) precursor of  $m/z$  124, (c) precursor of  $m/z$  178.

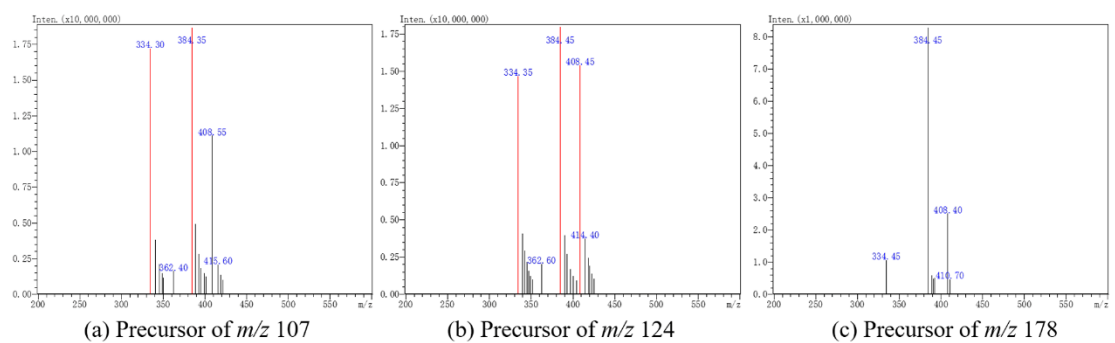



**Supplemental Figure S7** Precursor ions at retention time of 5.38 min. (a) precursor of  $m/z$  107, (b) precursor of  $m/z$  124, (c) precursor of  $m/z$  178.

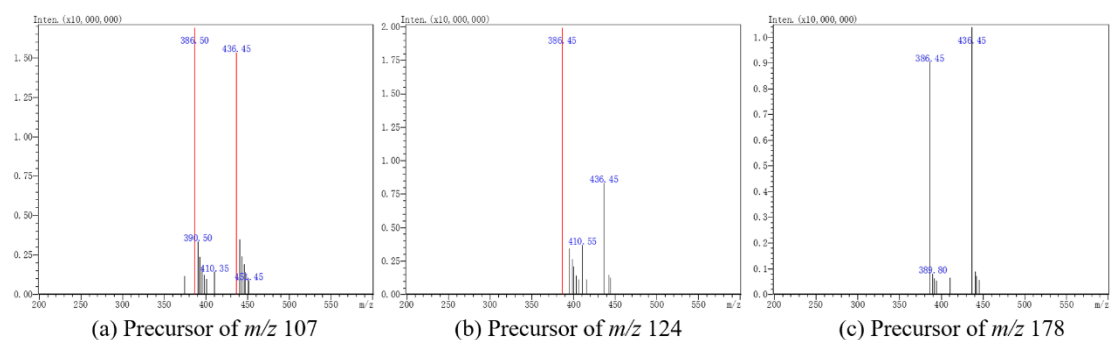

**Supplemental Figure S8** Precursor ions at retention time of 5.46 min. (a) precursor of  $m/z$  107, (b) precursor of  $m/z$  124, (c) precursor of  $m/z$  178.

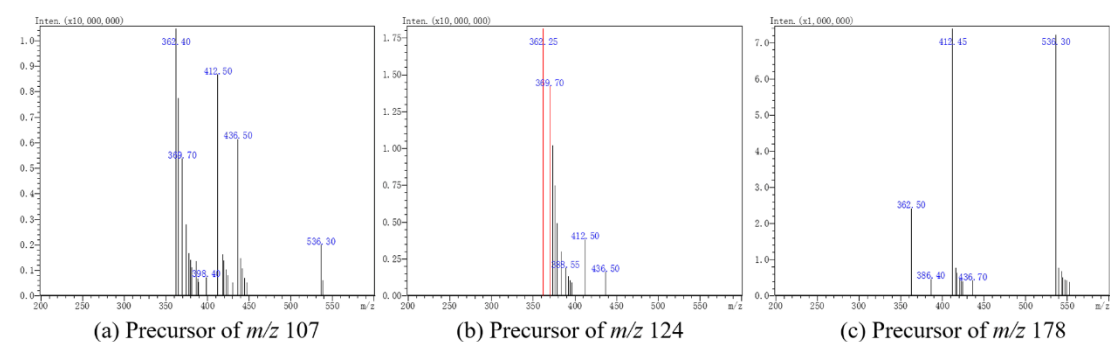

**Supplemental Figure S9** Precursor ions at retention time of 5.64 min. (a) precursor of  $m/z$  107, (b) precursor of  $m/z$  124, (c) precursor of  $m/z$  178.

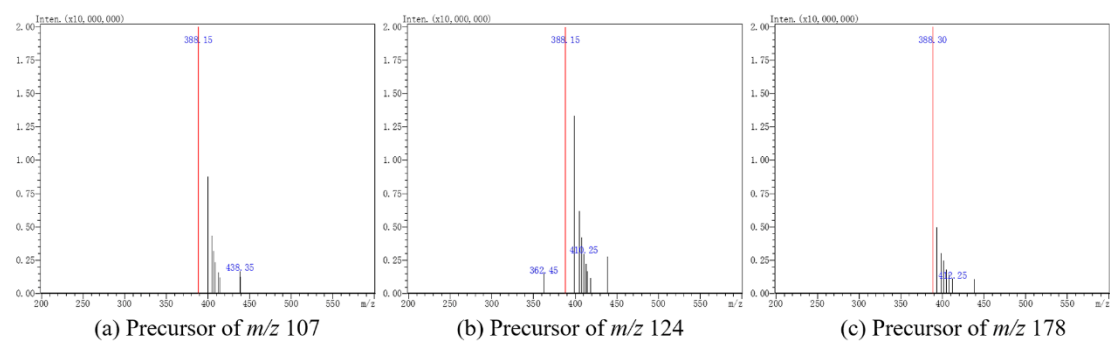

**Supplemental Figure S10** Precursor ions at retention time of 5.77 min. (a) precursor of  $m/z$  107, (b) precursor of  $m/z$  124, (c) precursor of  $m/z$  178.

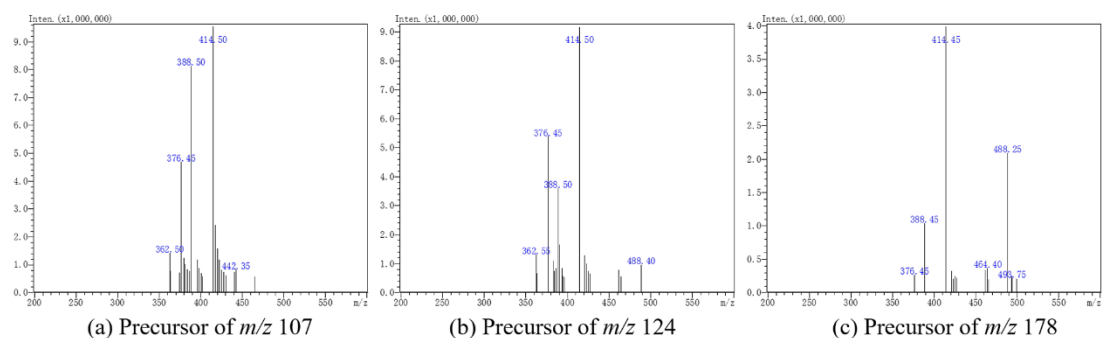

**Supplemental Figure S11** Precursor ions at retention time of 6.01 min. (a) precursor of  $m/z$  107, (b) precursor of  $m/z$  124, (c) precursor of  $m/z$  178.

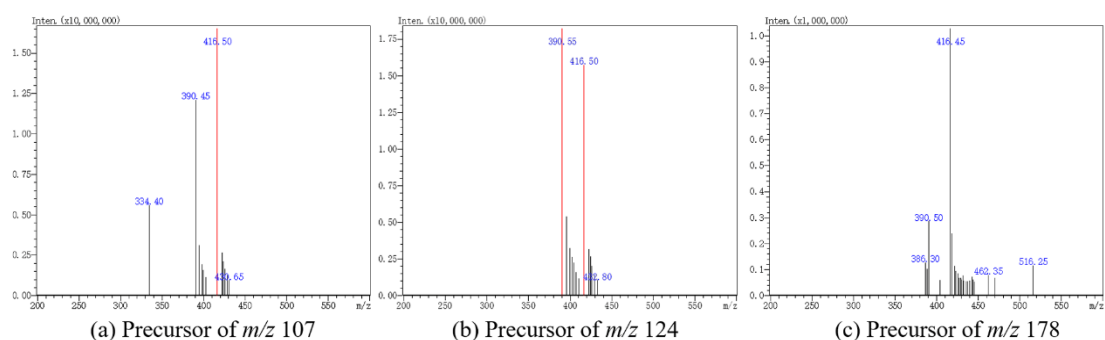

**Supplemental Figure S12** Precursor ions at retention time of 6.48 min. (a) precursor of  $m/z$  107, (b) precursor of  $m/z$  124, (c) precursor of  $m/z$  178.

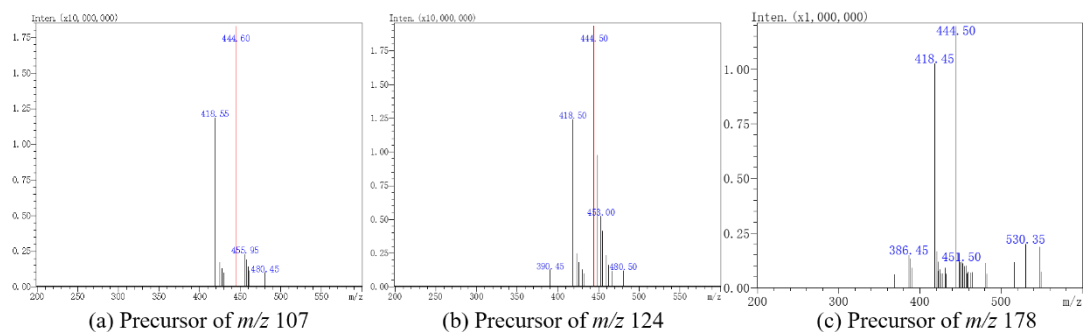

**Supplemental Figure S13** Precursor ions at retention time of 6.89 min. (a) precursor of  $m/z$  107, (b) precursor of  $m/z$  124, (c) precursor of  $m/z$  178.

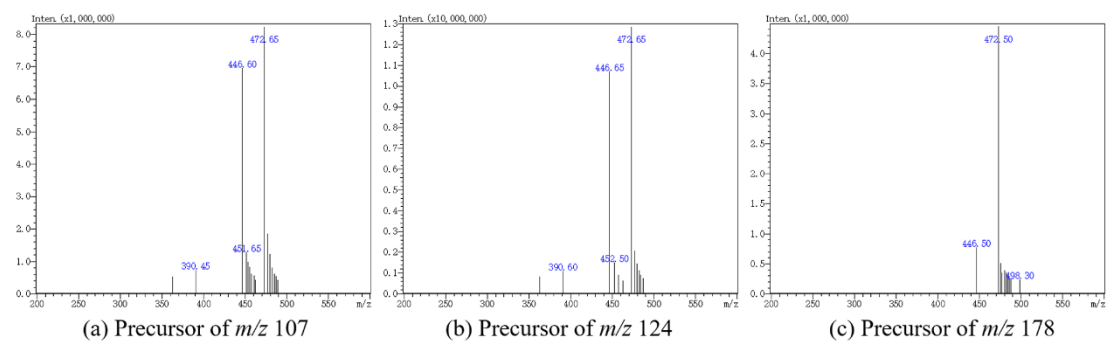

Supplement: supp_D119000514_156910_2_supp_466433_q4v459.pdf [file supp_D119000514_156910_2_supp_466433_q4v459.pdf]
